# Supplementary material for: Temperate phage-antibiotic synergy across antibiotic classes reveals new mechanism for preventing lysogeny
Source: Research Square preprint supplement (doi:10.21203/rs.3.rs-1386871/v1), 2022-02-23
Supplement: Supplementary file 1 [file 8b84ba7ace24674c9943b634.pdf]

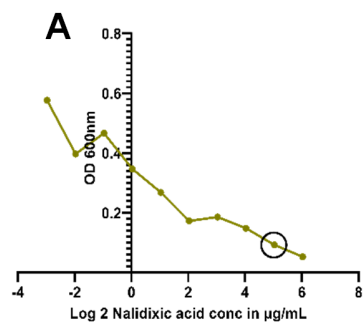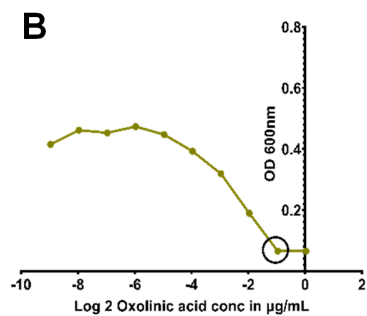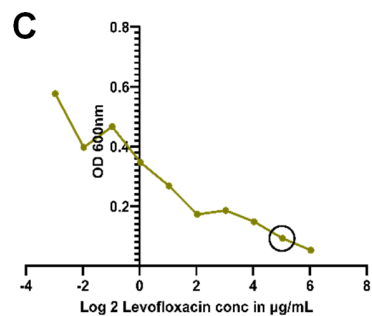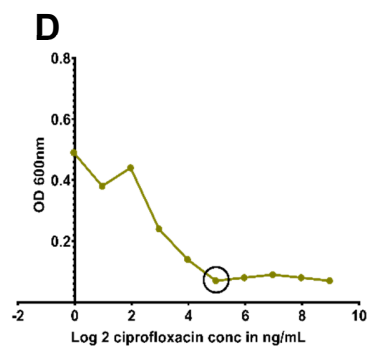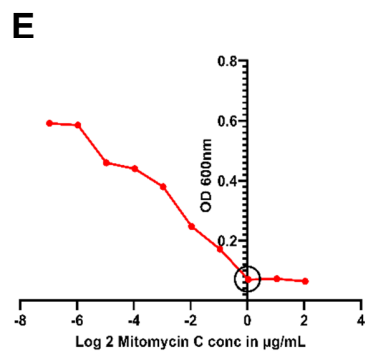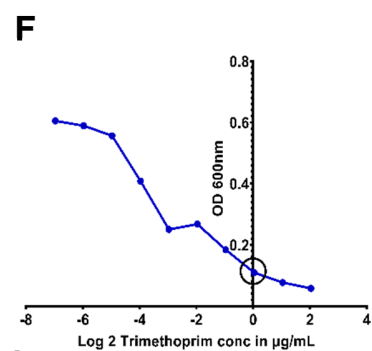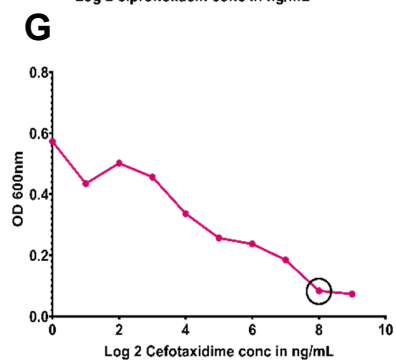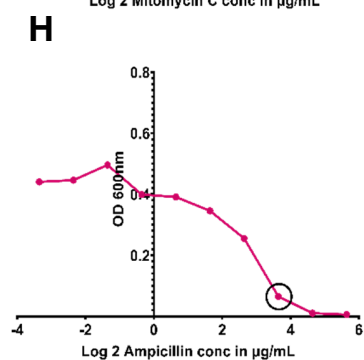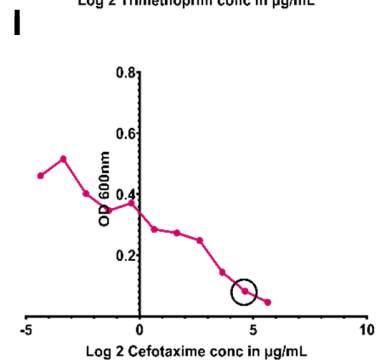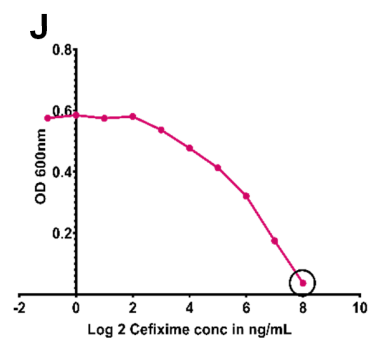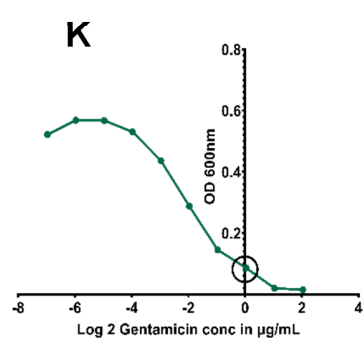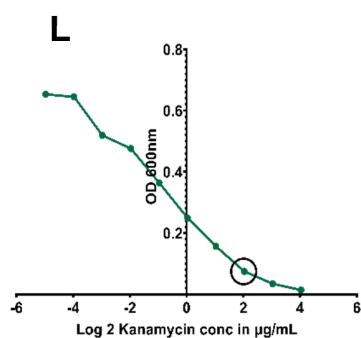

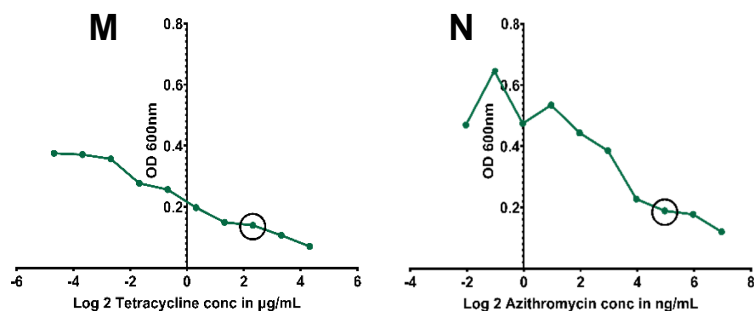

**SFig 1.** Endpoint readings after 18 hours of wild-type *E. coli* K-12 tracked in the absence and presence of serial concentrations of **(A)** Nalidixic acid, **(B)** Oxolinic acid, **(C)** Levofloxacin, **(D)** Ciprofloxacin, **(E)** Mitomycin C, **(F)** Trimethoprim, **(G)** Cefotaxidime, **(H)** Ampicillin, **(I)** Cefotaxime, **(J)** Cefixime, **(K)** Gentamicin, **(L)** Kanamycin, **(M)** Tetracycline and **(N)** Azithromycin averaged among 3 biological replicates. MIC is labelled in black circle.

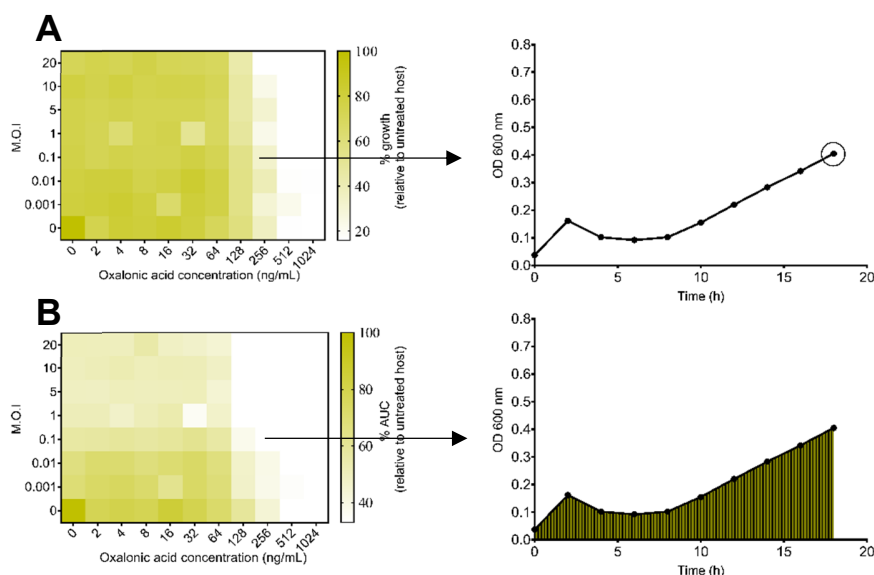

**SFig 2.** Illustration of the difference between **(A)** heat map based on end point reading and growth curve at MOI of 1 and oxolinic acid concentration of 256 ng/mL **(B)** heat map based on time point readings (AUC) and growth curve at the same point illustrating AUC. Both for oxolinic acid challenged with HK97.

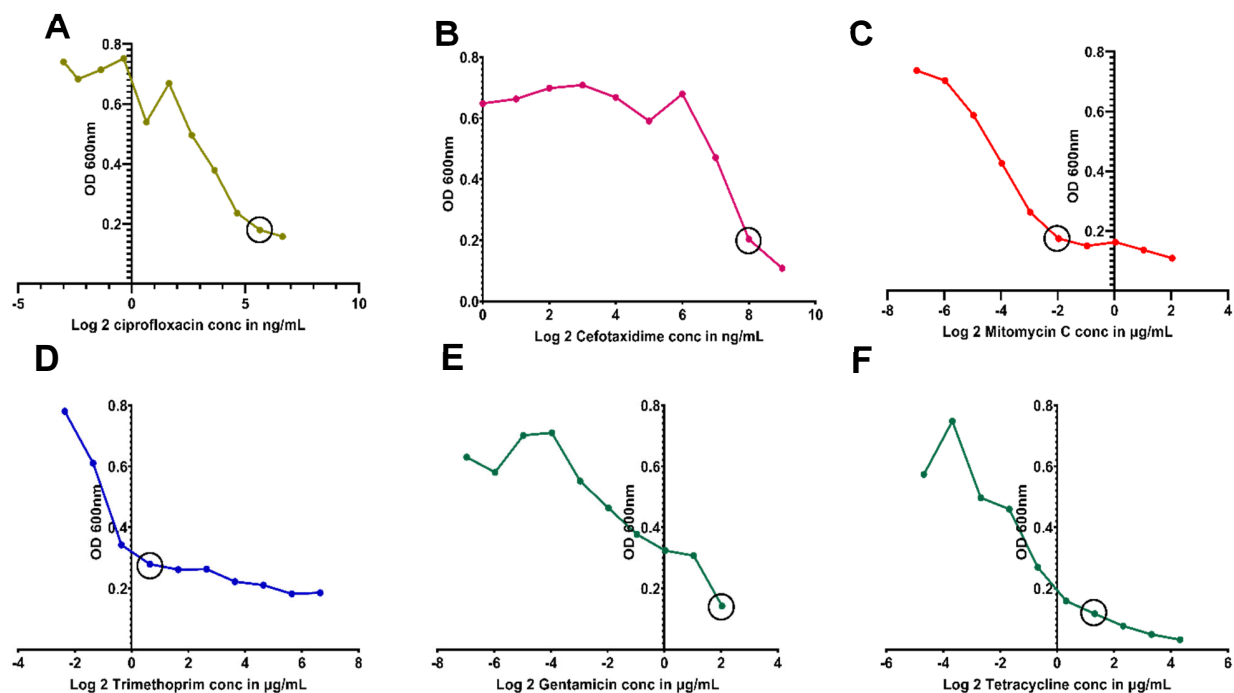

**SFig 3.** Endpoint readings after 18 hours of *recA* mutant tracked in the absence and presence of serial concentrations of **(A)** Cefotaxidime, **(B)** Mitomycin C, **(c)** Trimethoprim, **(D)** Gentamicin and **(E)** Tetracycline averaged among 3 biological replicates. MIC is labelled in black circle.

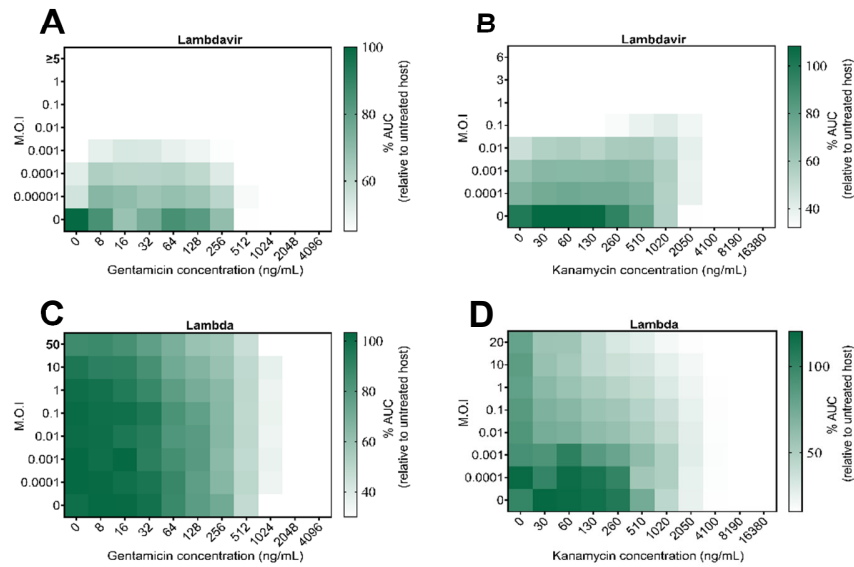

**S Fig 4.** Checkerboard assay of lambdavirus and: **(A)** gentamicin and **(B)** kanamycin. Area under the curve relative to untreated bacterial control, averaged among 3 biological replicates, plotted as a heatmap. Checkerboard assay of lambda and: **(C)** gentamicin and **(D)** kanamycin. Area under the curve relative to untreated bacterial control, averaged among 3 biological replicates, plotted as a heatmap.
